# Supplementary material for: Multi-sectoral and systemic drought risk in forested cold climates: stakeholder-informed vulnerability factors from Sweden
Source: Copernicus journal article supplement (doi:10.5194/hess-29-3809-2025), 2025-08-15
Supplement: Supplementary file 1 [file hess-29-3809-2025-supplement.pdf]

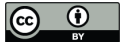

*Supplement of*

## **Multi-sectoral and systemic drought risk in forested cold climates: stakeholder-informed vulnerability factors from Sweden**

**Elin Stenfors et al.**

*Correspondence to:* Elin Stenfors ([elin.stenfors@geo.uu.se](mailto:elin.stenfors@geo.uu.se))

The copyright of individual parts of the supplement might differ from the article licence.

## S1. Supplementary tables

**Table S1 – Sectoral vulnerability factors, their subcategories and impact scores**

| <i>Sectoral Vulnerability factor</i>                       | <i>Subcategory</i> | <i>Agricultural</i> | <i>Energy</i> | <i>Environmental</i> | <i>Forestry</i> | <i>Water resources</i> | <i>Water supply</i> | <i>All sectors</i> |
|------------------------------------------------------------|--------------------|---------------------|---------------|----------------------|-----------------|------------------------|---------------------|--------------------|
| <i>(A) Dynamic models for decision support</i>             | Tools              | 0,42                | 0,33          | 0,68                 | 0,50            | 0,78                   | 0,44                | 0,56               |
| <i>(A) Funding for small scale water projects</i>          | Supply             | 0,75                | 0,20          | 0,65                 | 0,32            | 0,71                   | 0,35                | 0,54               |
| <i>(A) Local knowledge about adaptive approaches</i>       | Tools              | 0,71                | 0,58          | 0,66                 | 0,58            | 0,70                   | 0,63                | 0,65               |
| <i>(A) Local resolution risk modelling</i>                 | Tools              | 0,64                | 0,46          | 0,67                 | 0,50            | 0,79                   | 0,69                | 0,65               |
| <i>(A) Possibilities for development of water storage</i>  | Supply             | 0,85                | 0,70          | 0,68                 | 0,23            | 0,79                   | 0,81                | 0,68               |
| <i>(A) Scientists employed in sector</i>                   | Tools              | 0,61                | 0,38          | 0,45                 | 0,48            | 0,59                   | 0,43                | 0,49               |
| <i>(A) Species shift for climate adaptation (forests)</i>  | Species            | 0,44                | 0,13          | 0,64                 | 0,73            | 0,54                   | 0,21                | 0,56               |
| <i>(A) Species suitable for future drought projections</i> | Species            | 0,72                | 0,10          | 0,64                 | 0,58            | 0,50                   | 0,35                | 0,55               |
| <i>(A) Use of adaptive measures</i>                        | Tools              | 0,79                | 0,43          | 0,74                 | 0,67            | 0,80                   | 0,65                | 0,71               |
| <i>(C) Ability to apply for and receive funds</i>          | Funds              | 0,64                | 0,25          | 0,58                 | 0,29            | 0,48                   | 0,35                | 0,48               |
| <i>(C) Alternative water source &amp; water supply</i>     | Supply             | 0,81                | 0,60          | 0,76                 | 0,18            | 0,79                   | 0,83                | 0,70               |
| <i>(C) Apt size of water permits to sustain irrigation</i> | Irrigation         | 0,88                | 0,30          | 0,64                 | 0,13            | 0,73                   | 0,58                | 0,57               |
| <i>(C) Permanent water restrictions</i>                    | Supply             | 0,89                | 0,60          | 0,67                 | 0,28            | 0,52                   | 0,71                | 0,63               |
| <i>(C) Regional water distribution networks</i>            | Supply             | 0,50                | 0,25          | 0,58                 | 0,18            | 0,71                   | 0,77                | 0,55               |
| <i>(C) Sectoral actor's level of available assets</i>      | Funds              | 0,80                | 0,50          | 0,60                 | 0,31            | 0,63                   | 0,83                | 0,63               |
| <i>(C) Use of effective irrigation systems</i>             | Irrigation         | 0,98                | 0,25          | 0,56                 | 0,09            | 0,70                   | 0,64                | 0,55               |
| <i>(C) Use of irrigation</i>                               | Irrigation         | 0,94                | 0,25          | 0,51                 | 0,11            | 0,65                   | 0,56                | 0,51               |
| <i>(C) Water available for irrigation during drought</i>   | Irrigation         | 0,98                | 0,30          | 0,61                 | 0,07            | 0,67                   | 0,67                | 0,57               |
| <i>(S) Access to public drinking water service</i>         | Supply             | 0,75                | 0,15          | 0,73                 | 0,20            | 0,79                   | 0,88                | 0,66               |
| <i>(S) Baseline water stress</i>                           | Stress             | 0,92                | 0,63          | 0,84                 | 0,35            | 0,94                   | 0,80                | 0,79               |
| <i>(S) Competing water interests</i>                       | Stress             | 0,81                | 0,60          | 0,72                 | 0,23            | 0,77                   | 0,75                | 0,68               |
| <i>(S) Dependency on sector as only source of income</i>   | Funds              | 0,86                | 0,40          | 0,45                 | 0,33            | 0,44                   | 0,79                | 0,56               |
| <i>(S) Deteriorating ecosystems</i>                        | Stress             | 0,58                | 0,25          | 0,79                 | 0,48            | 0,66                   | 0,46                | 0,62               |
| <i>(S) Distribution of hydropower plants</i>               | Supply             | 0,54                | 0,68          | 0,57                 | 0,13            | 0,65                   | 0,58                | 0,55               |
| <i>(S) Drought resilient seedlings</i>                     | Species            | 0,83                | 0,15          | 0,61                 | 0,73            | 0,55                   | 0,39                | 0,61               |
| <i>(S) Drought resilient stand mixtures</i>                | Species            | 0,81                | 0,20          | 0,67                 | 0,70            | 0,57                   | 0,50                | 0,63               |
| <i>(S) Drought tolerance of current species</i>            | Species            | 0,90                | 0,25          | 0,76                 | 0,75            | 0,68                   | 0,47                | 0,70               |
| <i>(S) Fragmented forests or forests of small size</i>     | Stress             | 0,40                | 0,13          | 0,65                 | 0,41            | 0,44                   | 0,25                | 0,47               |
| <i>(S) Growth limiting conditions</i>                      | Setting            | 0,90                | 0,25          | 0,64                 | 0,79            | 0,68                   | 0,69                | 0,70               |
| <i>(S) Land and soil degradation</i>                       | Stress             | 0,60                | 0,10          | 0,70                 | 0,27            | 0,42                   | 0,58                | 0,52               |
| <i>(S) Level of groundwater exploitation</i>               | Stress             | 0,80                | 0,50          | 0,79                 | 0,41            | 0,75                   | 0,77                | 0,71               |
| <i>(S) Monocultures</i>                                    | Species            | 0,55                | 0,13          | 0,68                 | 0,59            | 0,48                   | 0,25                | 0,55               |
| <i>(S) Possibility to expand irrigation practices</i>      | Supply             | 0,90                | 0,30          | 0,52                 | 0,06            | 0,52                   | 0,58                | 0,49               |
| <i>(S) Presence of forest &amp; forest vegetation</i>      | Setting            | 0,50                | 0,50          | 0,72                 | 0,57            | 0,73                   | 0,39                | 0,62               |
| <i>(S) Presence of wetlands, lakes and ponds</i>           | Setting            | 0,63                | 0,75          | 0,91                 | 0,56            | 0,88                   | 0,77                | 0,78               |
| <i>(S) Productivity of land</i>                            | Setting            | 0,88                | 0,00          | 0,50                 | 0,40            | 0,36                   | 0,50                | 0,50               |

|                                                     |         |      |      |      |      |      |      |      |
|-----------------------------------------------------|---------|------|------|------|------|------|------|------|
| <i>(S) Proportion of fertile soils</i>              | Setting | 0,85 | 0,10 | 0,48 | 0,40 | 0,42 | 0,39 | 0,49 |
| <i>(S) Reliable water resource for water supply</i> | Supply  | 0,92 | 0,40 | 0,75 | 0,23 | 0,87 | 0,83 | 0,73 |
| <i>(S) Sectoral actor's level of solvency</i>       | Funds   | 0,88 | 0,35 | 0,29 | 0,21 | 0,25 | 0,75 | 0,48 |
| <i>(S) Shallow rooted crops/species</i>             | Species | 0,73 | 0,15 | 0,59 | 0,65 | 0,50 | 0,32 | 0,55 |
| <i>(S) Soil water holding capacity</i>              | Setting | 0,92 | 0,65 | 0,82 | 0,75 | 0,82 | 0,73 | 0,80 |
| <i>(S) Species outside its natural range</i>        | Species | 0,29 | 0,10 | 0,60 | 0,50 | 0,41 | 0,15 | 0,44 |
| <i>(S) The elevation</i>                            | Setting | 0,31 | 0,70 | 0,54 | 0,44 | 0,69 | 0,59 | 0,53 |
| <i>(S) The geographical characteristics</i>         | Setting | 0,73 | 0,75 | 0,73 | 0,71 | 0,75 | 0,86 | 0,75 |
| <i>(S) Water dependent ecosystems</i>               | Setting | 0,68 | 0,50 | 0,88 | 0,44 | 0,81 | 0,63 | 0,72 |
| <i>(S) Water quality deterioration</i>              | Stress  | 0,68 | 0,25 | 0,78 | 0,25 | 0,71 | 0,77 | 0,66 |

Table S2 – Governance vulnerability factors, their subcategories, and impact scores

| <i>Governance Vulnerability factor</i>                                 | <i>Subcategory</i> | <i>Society</i> | <i>Agricultural</i> | <i>Energy</i> | <i>Environmental</i> | <i>Forestry</i> | <i>Water resources</i> | <i>Water supply</i> | <i>All sectors</i> |
|------------------------------------------------------------------------|--------------------|----------------|---------------------|---------------|----------------------|-----------------|------------------------|---------------------|--------------------|
| <i>(A) Availability of drought risk assessment</i>                     | Tools              | 0,70           | 0,61                | 0,54          | 0,71                 | 0,60            | 0,79                   | 0,71                | 0,69               |
| <i>(A) Building standards relating to water efficiency</i>             | Policies           | 0,66           | 0,46                | 0,30          | 0,61                 | 0,17            | 0,58                   | 0,68                | 0,60               |
| <i>(A) Drought early warning systems</i>                               | Tools              | 0,69           | 0,73                | 0,38          | 0,55                 | 0,42            | 0,66                   | 0,65                | 0,63               |
| <i>(A) Drought monitoring schemes</i>                                  | Tools              | 0,74           | 0,68                | 0,38          | 0,66                 | 0,44            | 0,68                   | 0,65                | 0,67               |
| <i>(A) Groundwater monitoring</i>                                      | Tools              | 0,79           | 0,71                | 0,45          | 0,71                 | 0,46            | 0,80                   | 0,77                | 0,73               |
| <i>(A) Long-term supply &amp; demand assessments</i>                   | Tools              | 0,78           | 0,69                | 0,63          | 0,79                 | 0,50            | 0,88                   | 0,77                | 0,75               |
| <i>(A) Planned drought prevention measures (authority level)</i>       | Policies           | 0,79           | 0,65                | 0,65          | 0,76                 | 0,46            | 0,81                   | 0,63                | 0,74               |
| <i>(A) Real time DRA and DRM tools</i>                                 | Tools              | 0,71           | 0,75                | 0,29          | 0,61                 | 0,48            | 0,69                   | 0,66                | 0,66               |
| <i>(A) Relevant data regarding drought</i>                             | Tools              | 0,73           | 0,81                | 0,71          | 0,71                 | 0,50            | 0,79                   | 0,68                | 0,71               |
| <i>(C) Collaborative decision making &amp; development (authority)</i> | Governance         | 0,72           | 0,64                | 0,44          | 0,73                 | 0,35            | 0,75                   | 0,72                | 0,69               |
| <i>(C) Competence-level within authorities*</i>                        | Governance         | 0,74           | 0,84                | 0,25          | 0,63                 | 0,58            | 0,70                   | 0,67                | 0,70               |
| <i>(C) Coordinated Water Strategy (authority level)</i>                | Policies           | 0,77           | 0,64                | 0,70          | 0,78                 | 0,25            | 0,87                   | 0,67                | 0,74               |
| <i>(C) Coordination &amp; cooperation among authorities*</i>           | Governance         | 0,74           | 0,75                | 0,33          | 0,64                 | 0,41            | 0,61                   | 0,66                | 0,68               |
| <i>(C) Decision support systems regarding drought</i>                  | Tools              | 0,72           | 0,66                | 0,46          | 0,69                 | 0,58            | 0,79                   | 0,67                | 0,69               |
| <i>(C) Defined water use rights</i>                                    | Policies           | 0,77           | 0,67                | 0,88          | 0,74                 | 0,21            | 0,81                   | 0,73                | 0,73               |
| <i>(C) Drought awareness within authorities</i>                        | Governance         | 0,76           | 0,77                | 0,67          | 0,71                 | 0,50            | 0,85                   | 0,71                | 0,73               |
| <i>(C) Drought plan incl raising awareness (authority level)</i>       | Policies           | 0,75           | 0,60                | 0,44          | 0,74                 | 0,42            | 0,83                   | 0,68                | 0,71               |
| <i>(C) Financial capacity of the government*</i>                       | Governance         | 0,65           | 0,77                | 0,25          | 0,60                 | 0,33            | 0,55                   | 0,52                | 0,61               |
| <i>(C) Local water management plan</i>                                 | Policies           | 0,77           | 0,73                | 0,65          | 0,80                 | 0,25            | 0,88                   | 0,70                | 0,75               |
| <i>(C) Presence of a DMP</i>                                           | Policies           | 0,75           | 0,58                | 0,63          | 0,76                 | 0,42            | 0,77                   | 0,72                | 0,72               |

*(C) Social/physical capacity within authorities\**

*(C) Water transfer and drought policies*

*(C) Water use priority classes in authority level DMP*

|            |      |      |      |      |      |      |      |      |
|------------|------|------|------|------|------|------|------|------|
| Governance | 0,63 |      |      |      |      |      |      | 0,63 |
| Policies   | 0,73 | 0,70 | 0,50 | 0,69 | 0,25 | 0,81 | 0,67 | 0,69 |
| Policies   | 0,77 | 0,78 | 0,63 | 0,71 | 0,29 | 0,77 | 0,73 | 0,73 |

**Table S3 - Societal vulnerability factors, their subcategories, and impact scores**

| <i>Societal vulnerability factors</i>                      | <i>subcategory</i> | <i>Society</i> |
|------------------------------------------------------------|--------------------|----------------|
| <i>(C) Drought awareness among water users</i>             | Setting            | 0,75           |
| <i>(S) Access to public drinking water service</i>         | Supply             | 0,75           |
| <i>(S) Size of population</i>                              | Setting            | 0,69           |
| <i>(S) Size of town</i>                                    | Setting            | 0,67           |
| <i>(S) Societal financial dependency on DWC industries</i> | Setting            | 0,77           |

**Table S4- Overview of respondent characteristics**

| Sector                | Gender identity |    |    | Place of employment |            |         |                       |                   | Work experience    |          |         | Drought experience |     |    | Geographical location |       |
|-----------------------|-----------------|----|----|---------------------|------------|---------|-----------------------|-------------------|--------------------|----------|---------|--------------------|-----|----|-----------------------|-------|
|                       | F               | M  | NA | Authority           | Enterprise | NGO     | Research              | Trade association | 0-5 yrs            | 5-10 yrs | >10 yrs | 1-2                | 3-4 |    | North                 | South |
| Agricultural          | 10              | 3  |    | 2                   | 1          |         | 5                     | 5                 | 4                  | 2        | 7       | 1                  | 2   | 10 | 1                     | 12    |
| Energy                | 1               | 6  |    | 1                   | 4          |         | 1                     | 1                 | 2                  | 1        | 4       | 1                  | 1   | 5  | 2                     | 5     |
| Environmental         | 15              | 16 | 4  | 29                  |            | 1       | 5                     |                   | 10                 | 5        | 20      | 8                  | 14  | 13 | 7                     | 28    |
| Forestry              | 1               | 12 | 1  | 4                   | 4          |         | 6                     |                   | 1                  | 1        | 12      |                    | 3   | 11 | 4                     | 10    |
| Water resources       | 8               | 6  | 1  | 11                  | 1          | 1       | 2                     |                   | 2                  | 9        | 4       | 3                  | 4   | 8  |                       | 15    |
| Water supply          | 8               | 7  | 1  | 14                  | 1          |         |                       | 1                 | 2                  | 2        | 12      | 3                  | 3   | 10 | 2                     | 14    |
| Organization          | Gender identity |    |    | Work experience     |            |         | Geographical location |                   | Drought experience |          |         |                    |     |    |                       |       |
|                       |                 |    |    | 0-5 yrs             | 5-10 yrs   | >10 yrs | North                 | South             | 1-2                | 2        | 3-4     |                    |     |    |                       |       |
|                       | F               | M  | NA |                     |            |         |                       |                   |                    |          |         |                    |     |    |                       |       |
| Authority             | 32              | 25 | 5  | 16                  | 15         | 31      | 9                     | 53                | 14                 | 19       | 29      |                    |     |    |                       |       |
| Enterprise            | 2               | 9  | 1  | 2                   | 3          | 7       | 5                     | 7                 | 4                  |          | 8       |                    |     |    |                       |       |
| NGO                   | 2               |    |    | 1                   | 1          |         | 2                     |                   | 1                  | 1        |         |                    |     |    |                       |       |
| Research              | 6               | 12 | 1  | 1                   | 1          | 17      | 2                     | 17                | 1                  | 5        | 13      |                    |     |    |                       |       |
| Trade association     | 4               | 3  |    | 1                   | 2          | 4       | 7                     |                   | 1                  | 6        |         |                    |     |    |                       |       |
| Geographical location | Gender identity |    |    | Work experience     |            |         | Drought experience    |                   |                    |          |         |                    |     |    |                       |       |
|                       | F               | M  | NA | 0-5 yrs             | 5-10 yrs   | >10 yrs | 1-2                   | 2                 | 3-4                |          |         |                    |     |    |                       |       |
| North                 | 6               | 9  | 1  | 5                   | 2          | 9       | 4                     | 6                 | 6                  |          |         |                    |     |    |                       |       |
| South                 | 38              | 42 | 6  | 16                  | 19         | 51      | 13                    | 22                | 51                 |          |         |                    |     |    |                       |       |

**Table S5 – Number of respondents per sector as well as primary field of focus within the sector**

| <i>Sector and primary focus</i>                   | <i>Respondents (n)</i> |
|---------------------------------------------------|------------------------|
| <b>Agricultural</b>                               | <b>13</b>              |
| Crop production                                   | 7                      |
| Advocacy activities for green industries          | 1                      |
| Crop and vegetable production, & animal husbandry | 1                      |
| Animal husbandry & production                     | 2                      |
| Food strategy                                     | 1                      |
| Other                                             | 1                      |
| <b>Energy</b>                                     | <b>7</b>               |
| Hydropower                                        | 6                      |
| Other                                             | 1                      |
| <b>Environmental</b>                              | <b>35</b>              |
| Aquatic ecosystems                                | 9                      |
| Both aquatic & terrestrial ecosystems             | 16                     |
| Terrestrial ecosystems                            | 10                     |
| <b>Forestry</b>                                   | <b>14</b>              |
| -                                                 | 1                      |
| Both production and nature conservation           | 1                      |
| Ecosystem services                                | 1                      |
| Nature conservation                               | 4                      |
| Production                                        | 6                      |
| Research                                          | 1                      |
| <b>Unspecified</b>                                | <b>1</b>               |
| -                                                 | 1                      |
| <b>Water intensive industry</b>                   | <b>1</b>               |
| Paper- & pulp industry                            | 1                      |
| <b>Water resources</b>                            | <b>15</b>              |
| Exercise of authority                             | 1                      |
| Society                                           | 1                      |
| Water management                                  | 1                      |
| Water quality effects in physical planning        | 1                      |
| Water resource management                         | 11                     |
| <b>Water supply</b>                               | <b>16</b>              |
| Drinking water production & distribution          | 16                     |
| <b>Grand Total</b>                                | <b>102</b>             |



**Table S6 –Significant differences in sectoral factor ratings (p-value <0.05) based on pairwise Wilcoxon Rank sum test, with corrections for multiple testing, using the Benjamini-Hochberg method for p-value adjustment.**

| <i>Sectoral vulnerability factor</i>                   | <i>Sectors</i>  |                 | <i>p-value</i> | <i>Subcategory</i> |
|--------------------------------------------------------|-----------------|-----------------|----------------|--------------------|
| <i>Funding for small scale water projects</i>          | Energy          | Agricultural    | 0,0142         | Supply             |
| <i>Funding for small scale water projects</i>          | Environmental   | Energy          | 0,0142         | Supply             |
| <i>Funding for small scale water projects</i>          | Forestry        | Agricultural    | 0,0142         | Supply             |
| <i>Funding for small scale water projects</i>          | Forestry        | Environmental   | 0,0142         | Supply             |
| <i>Funding for small scale water projects</i>          | Water resources | Energy          | 0,0142         | Supply             |
| <i>Funding for small scale water projects</i>          | Water resources | Forestry        | 0,0142         | Supply             |
| <i>Funding for small scale water projects</i>          | Water supply    | Agricultural    | 0,0157         | Supply             |
| <i>Funding for small scale water projects</i>          | Water supply    | Environmental   | 0,0142         | Supply             |
| <i>Funding for small scale water projects</i>          | Water supply    | Water resources | 0,0142         | Supply             |
| <i>Species shift for climate adaptation (forests)</i>  | Forestry        | Energy          | 0,0180         | Species            |
| <i>Species shift for climate adaptation (forests)</i>  | Water supply    | Forestry        | 0,0180         | Species            |
| <i>Sectoral actor's level of available assets</i>      | Forestry        | Agricultural    | 0,0096         | Funds              |
| <i>Sectoral actor's level of available assets</i>      | Water supply    | Forestry        | 0,0079         | Funds              |
| <i>Sectoral actor's level of solvency</i>              | Energy          | Agricultural    | 0,0148         | Funds              |
| <i>Sectoral actor's level of solvency</i>              | Environmental   | Agricultural    | 0,0048         | Funds              |
| <i>Sectoral actor's level of solvency</i>              | Forestry        | Agricultural    | 0,0046         | Funds              |
| <i>Sectoral actor's level of solvency</i>              | Water resources | Agricultural    | 0,0101         | Funds              |
| <i>Sectoral actor's level of solvency</i>              | Water supply    | Energy          | 0,0395         | Funds              |
| <i>Sectoral actor's level of solvency</i>              | Water supply    | Environmental   | 0,0148         | Funds              |
| <i>Sectoral actor's level of solvency</i>              | Water supply    | Forestry        | 0,0046         | Funds              |
| <i>Sectoral actor's level of solvency</i>              | Water supply    | Water resources | 0,0302         | Funds              |
| <i>Dependency on sector as only source of income</i>   | Forestry        | Agricultural    | 0,0351         | Funds              |
| <i>Apt size of water permits to sustain irrigation</i> | Energy          | Agricultural    | 0,0126         | Irrigation         |
| <i>Apt size of water permits to sustain irrigation</i> | Environmental   | Agricultural    | 0,0432         | Irrigation         |
| <i>Apt size of water permits to sustain irrigation</i> | Forestry        | Agricultural    | 0,0005         | Irrigation         |
| <i>Apt size of water permits to sustain irrigation</i> | Forestry        | Environmental   | 0,0021         | Irrigation         |
| <i>Apt size of water permits to sustain irrigation</i> | Water resources | Forestry        | 0,0021         | Irrigation         |
| <i>Apt size of water permits to sustain irrigation</i> | Water supply    | Agricultural    | 0,0301         | Irrigation         |
| <i>Apt size of water permits to sustain irrigation</i> | Water supply    | Forestry        | 0,0055         | Irrigation         |
| <i>Use of effective irrigation systems</i>             | Energy          | Agricultural    | 0,0010         | Irrigation         |
| <i>Use of effective irrigation systems</i>             | Environmental   | Agricultural    | 0,0003         | Irrigation         |
| <i>Use of effective irrigation systems</i>             | Forestry        | Agricultural    | 0,0000         | Irrigation         |
| <i>Use of effective irrigation systems</i>             | Forestry        | Environmental   | 0,0003         | Irrigation         |
| <i>Use of effective irrigation systems</i>             | Water resources | Agricultural    | 0,0290         | Irrigation         |
| <i>Use of effective irrigation systems</i>             | Water resources | Forestry        | 0,0008         | Irrigation         |
| <i>Use of effective irrigation systems</i>             | Water supply    | Agricultural    | 0,0034         | Irrigation         |
| <i>Use of effective irrigation systems</i>             | Water supply    | Forestry        | 0,0014         | Irrigation         |
| <i>Use of irrigation</i>                               | Energy          | Agricultural    | 0,0022         | Irrigation         |
| <i>Use of irrigation</i>                               | Environmental   | Agricultural    | 0,0007         | Irrigation         |
| <i>Use of irrigation</i>                               | Forestry        | Agricultural    | 0,0001         | Irrigation         |

|                                                      |                 |               |        |            |
|------------------------------------------------------|-----------------|---------------|--------|------------|
| <i>Use of irrigation</i>                             | Forestry        | Environmental | 0,0007 | Irrigation |
| <i>Use of irrigation</i>                             | Water resources | Agricultural  | 0,0101 | Irrigation |
| <i>Use of irrigation</i>                             | Water resources | Energy        | 0,0400 | Irrigation |
| <i>Use of irrigation</i>                             | Water resources | Forestry      | 0,0007 | Irrigation |
| <i>Use of irrigation</i>                             | Water supply    | Agricultural  | 0,0033 | Irrigation |
| <i>Use of irrigation</i>                             | Water supply    | Forestry      | 0,0033 | Irrigation |
| <i>Water available for irrigation during drought</i> | Energy          | Agricultural  | 0,0006 | Irrigation |
| <i>Water available for irrigation during drought</i> | Environmental   | Agricultural  | 0,0005 | Irrigation |
| <i>Water available for irrigation during drought</i> | Forestry        | Agricultural  | 0,0000 | Irrigation |
| <i>Water available for irrigation during drought</i> | Forestry        | Environmental | 0,0001 | Irrigation |
| <i>Water available for irrigation during drought</i> | Water resources | Agricultural  | 0,0271 | Irrigation |
| <i>Water available for irrigation during drought</i> | Water resources | Forestry      | 0,0008 | Irrigation |
| <i>Water available for irrigation during drought</i> | Water supply    | Agricultural  | 0,0022 | Irrigation |
| <i>Water available for irrigation during drought</i> | Water supply    | Forestry      | 0,0004 | Irrigation |
| <i>Possibility to expand irrigation practices</i>    | Energy          | Agricultural  | 0,0076 | Supply     |
| <i>Possibility to expand irrigation practices</i>    | Environmental   | Agricultural  | 0,0076 | Supply     |
| <i>Possibility to expand irrigation practices</i>    | Forestry        | Agricultural  | 0,0001 | Supply     |
| <i>Possibility to expand irrigation practices</i>    | Forestry        | Environmental | 0,0007 | Supply     |
| <i>Possibility to expand irrigation practices</i>    | Water resources | Agricultural  | 0,0108 | Supply     |
| <i>Possibility to expand irrigation practices</i>    | Water resources | Forestry      | 0,0032 | Supply     |
| <i>Possibility to expand irrigation practices</i>    | Water supply    | Agricultural  | 0,0103 | Supply     |
| <i>Possibility to expand irrigation practices</i>    | Water supply    | Forestry      | 0,0007 | Supply     |
| <i>Land and soil degradation</i>                     | Energy          | Agricultural  | 0,0434 | Stress     |
| <i>Land and soil degradation</i>                     | Environmental   | Energy        | 0,0099 | Stress     |
| <i>Land and soil degradation</i>                     | Forestry        | Environmental | 0,0099 | Stress     |
| <i>Land and soil degradation</i>                     | Water supply    | Energy        | 0,0434 | Stress     |
| <i>Productivity of land</i>                          | Energy          | Agricultural  | 0,0032 | Setting    |
| <i>Productivity of land</i>                          | Environmental   | Agricultural  | 0,0032 | Setting    |
| <i>Productivity of land</i>                          | Environmental   | Energy        | 0,0032 | Setting    |
| <i>Productivity of land</i>                          | Forestry        | Agricultural  | 0,0032 | Setting    |
| <i>Productivity of land</i>                          | Forestry        | Energy        | 0,0122 | Setting    |
| <i>Productivity of land</i>                          | Water resources | Agricultural  | 0,0050 | Setting    |
| <i>Productivity of land</i>                          | Water supply    | Agricultural  | 0,0050 | Setting    |
| <i>Productivity of land</i>                          | Water supply    | Energy        | 0,0050 | Setting    |
| <i>Proportion of fertile soils</i>                   | Energy          | Agricultural  | 0,0077 | Setting    |
| <i>Proportion of fertile soils</i>                   | Environmental   | Agricultural  | 0,0077 | Setting    |
| <i>Proportion of fertile soils</i>                   | Environmental   | Energy        | 0,0336 | Setting    |
| <i>Proportion of fertile soils</i>                   | Forestry        | Agricultural  | 0,0157 | Setting    |
| <i>Proportion of fertile soils</i>                   | Water resources | Agricultural  | 0,0209 | Setting    |
| <i>Proportion of fertile soils</i>                   | Water supply    | Agricultural  | 0,0157 | Setting    |
| <i>Drought resilient seedlings</i>                   | Energy          | Agricultural  | 0,0301 | Species    |
| <i>Drought resilient seedlings</i>                   | Environmental   | Energy        | 0,0375 | Species    |
| <i>Drought resilient seedlings</i>                   | Forestry        | Energy        | 0,0375 | Species    |
| <i>Drought resilient seedlings</i>                   | Water supply    | Agricultural  | 0,0375 | Species    |

|                                                        |                 |               |        |         |
|--------------------------------------------------------|-----------------|---------------|--------|---------|
| <i>Drought resilient stand mixtures</i>                | Energy          | Agricultural  | 0,0442 | Species |
| <i>Drought resilient stand mixtures</i>                | Environmental   | Energy        | 0,0442 | Species |
| <i>Drought resilient stand mixtures</i>                | Forestry        | Energy        | 0,0442 | Species |
| <i>Shallow rooted crops/species</i>                    | Energy          | Agricultural  | 0,0378 | Species |
| <i>Shallow rooted crops/species</i>                    | Forestry        | Energy        | 0,0378 | Species |
| <i>Shallow rooted crops/species</i>                    | Water supply    | Agricultural  | 0,0378 | Species |
| <i>Species suitable for future drought projections</i> | Energy          | Agricultural  | 0,0470 | Species |
| <i>Species suitable for future drought projections</i> | Environmental   | Energy        | 0,0470 | Species |
| <i>Drought tolerance of current species</i>            | Energy          | Agricultural  | 0,0234 | Species |
| <i>Drought tolerance of current species</i>            | Environmental   | Energy        | 0,0267 | Species |
| <i>Drought tolerance of current species</i>            | Forestry        | Energy        | 0,0281 | Species |
| <i>Drought tolerance of current species</i>            | Water supply    | Agricultural  | 0,0358 | Species |
| <i>Deteriorating ecosystems</i>                        | Environmental   | Energy        | 0,0196 | Stress  |
| <i>Deteriorating ecosystems</i>                        | Forestry        | Environmental | 0,0240 | Stress  |
| <i>Deteriorating ecosystems</i>                        | Water supply    | Environmental | 0,0240 | Stress  |
| <i>Presence of wetlands, lakes and ponds</i>           | Environmental   | Agricultural  | 0,0078 | Setting |
| <i>Presence of wetlands, lakes and ponds</i>           | Forestry        | Environmental | 0,0011 | Setting |
| <i>Presence of wetlands, lakes and ponds</i>           | Water resources | Forestry      | 0,0175 | Setting |
| <i>Water dependent ecosystems</i>                      | Forestry        | Environmental | 0,0003 | Setting |
| <i>Water dependent ecosystems</i>                      | Water resources | Forestry      | 0,0218 | Setting |
| <i>Water dependent ecosystems</i>                      | Water supply    | Environmental | 0,0218 | Setting |
| <i>Water quality deterioration</i>                     | Environmental   | Energy        | 0,0105 | Stress  |
| <i>Water quality deterioration</i>                     | Forestry        | Agricultural  | 0,0105 | Stress  |
| <i>Water quality deterioration</i>                     | Forestry        | Environmental | 0,0003 | Stress  |
| <i>Water quality deterioration</i>                     | Water resources | Forestry      | 0,0141 | Stress  |
| <i>Water quality deterioration</i>                     | Water supply    | Energy        | 0,0308 | Stress  |
| <i>Water quality deterioration</i>                     | Water supply    | Forestry      | 0,0061 | Stress  |
| <i>Access to public drinking water service</i>         | Energy          | Agricultural  | 0,0163 | Supply  |
| <i>Access to public drinking water service</i>         | Environmental   | Energy        | 0,0064 | Supply  |
| <i>Access to public drinking water service</i>         | Forestry        | Agricultural  | 0,0042 | Supply  |
| <i>Access to public drinking water service</i>         | Forestry        | Environmental | 0,0009 | Supply  |
| <i>Access to public drinking water service</i>         | Water resources | Energy        | 0,0103 | Supply  |
| <i>Access to public drinking water service</i>         | Water resources | Forestry      | 0,0025 | Supply  |
| <i>Access to public drinking water service</i>         | Water supply    | Energy        | 0,0042 | Supply  |
| <i>Access to public drinking water service</i>         | Water supply    | Forestry      | 0,0009 | Supply  |
| <i>Level of groundwater exploitation</i>               | Forestry        | Agricultural  | 0,0499 | Stress  |
| <i>Level of groundwater exploitation</i>               | Forestry        | Environmental | 0,0169 | Stress  |
| <i>Level of groundwater exploitation</i>               | Water resources | Forestry      | 0,0499 | Stress  |
| <i>Level of groundwater exploitation</i>               | Water supply    | Forestry      | 0,0499 | Stress  |
| <i>Possibilities for development of water storage</i>  | Forestry        | Agricultural  | 0,0008 | Supply  |
| <i>Possibilities for development of water storage</i>  | Forestry        | Environmental | 0,0011 | Supply  |
| <i>Possibilities for development of water storage</i>  | Water resources | Forestry      | 0,0008 | Supply  |
| <i>Possibilities for development of water storage</i>  | Water supply    | Forestry      | 0,0008 | Supply  |
| <i>Alternative water source &amp; water supply</i>     | Forestry        | Agricultural  | 0,0010 | Supply  |

*Alternative water source & water supply*  
*Alternative water source & water supply*  
*Alternative water source & water supply*  
*Competing water interests*  
*Competing water interests*  
*Competing water interests*  
*Competing water interests*  
*Permanent water restrictions*  
*Regional water distribution networks*  
*Regional water distribution networks*  
*Regional water distribution networks*  
*Regional water distribution networks*  
*Reliable water resource for water supply*  
*Baseline water stress*  
*Baseline water stress*  
*Baseline water stress*  
*Baseline water stress*  
*Baseline water stress*

|                 |               |        |        |
|-----------------|---------------|--------|--------|
| Forestry        | Environmental | 0,0002 | Supply |
| Water resources | Forestry      | 0,0014 | Supply |
| Water supply    | Forestry      | 0,0010 | Supply |
| Forestry        | Agricultural  | 0,0027 | Stress |
| Forestry        | Environmental | 0,0009 | Stress |
| Water resources | Forestry      | 0,0018 | Stress |
| Water supply    | Forestry      | 0,0027 | Stress |
| Environmental   | Agricultural  | 0,0433 | Supply |
| Forestry        | Agricultural  | 0,0067 | Supply |
| Forestry        | Environmental | 0,0176 | Supply |
| Water resources | Agricultural  | 0,0245 | Supply |
| Water supply    | Forestry      | 0,0201 | Supply |
| Forestry        | Agricultural  | 0,0255 | Supply |
| Forestry        | Environmental | 0,0065 | Supply |
| Water resources | Forestry      | 0,0065 | Supply |
| Water supply    | Forestry      | 0,0065 | Supply |
| Energy          | Agricultural  | 0,0081 | Supply |
| Forestry        | Agricultural  | 0,0006 | Supply |
| Forestry        | Environmental | 0,0007 | Supply |
| Water resources | Energy        | 0,0140 | Supply |
| Water resources | Forestry      | 0,0007 | Supply |
| Water supply    | Energy        | 0,0349 | Supply |
| Water supply    | Forestry      | 0,0013 | Supply |
| Energy          | Agricultural  | 0,0441 | Stress |
| Forestry        | Agricultural  | 0,0029 | Stress |
| Forestry        | Environmental | 0,0029 | Stress |
| Water resources | Forestry      | 0,0029 | Stress |
| Water supply    | Forestry      | 0,0163 | Stress |

**Table S7a –Significant difference in governance factor ratings (p-value <0.05) for sectoral drought risk depending on sectoral focus of respondents, based on pairwise Wilcoxon Rank sum test, with corrections for multiple testing, using the Benjamini-Hochberg method for p-value adjustment.**

| <i>Governance vulnerability factor</i>                       | <i>Sectors</i>  |               | <i>p-value</i> | <i>subcategory</i> |
|--------------------------------------------------------------|-----------------|---------------|----------------|--------------------|
| <i>Relevant data regarding drought</i>                       | Forestry        | Agricultural  | 0,0385         | Tools              |
| <i>Long-term supply &amp; demand assessments</i>             | Forestry        | Environmental | 0,0203         | Tools              |
| <i>Long-term supply &amp; demand assessments</i>             | Water resources | Forestry      | 0,0203         | Tools              |
| <i>Groundwater monitoring</i>                                | Water resources | Forestry      | 0,0254         | Tools              |
| <i>Groundwater monitoring</i>                                | Water supply    | Forestry      | 0,0254         | Tools              |
| <i>Coordinated Water Strategy (authority level)</i>          | Forestry        | Environmental | 0,0089         | Policies           |
| <i>Coordinated Water Strategy (authority level)</i>          | Water resources | Forestry      | 0,0089         | Policies           |
| <i>Drought plan incl raising awareness (authority level)</i> | Water resources | Forestry      | 0,0393         | Policies           |
| <i>Local water management plan</i>                           | Forestry        | Environmental | 0,0077         | Policies           |
| <i>Local water management plan</i>                           | Water resources | Forestry      | 0,0077         | Policies           |
| <i>Water transfer and drought policies</i>                   | Forestry        | Environmental | 0,0295         | Policies           |
| <i>Water transfer and drought policies</i>                   | Water resources | Forestry      | 0,0207         | Policies           |
| <i>Defined water-use rights</i>                              | Forestry        | Agricultural  | 0,0483         | Policies           |
| <i>Defined water-use rights</i>                              | Forestry        | Energy        | 0,0483         | Policies           |
| <i>Defined water-use rights</i>                              | Forestry        | Environmental | 0,0121         | Policies           |
| <i>Defined water-use rights</i>                              | Water resources | Forestry      | 0,0138         | Policies           |
| <i>Defined water-use rights</i>                              | Water supply    | Forestry      | 0,0194         | Policies           |

**Table S7b Significant difference in governance factor ratings (p-value <0.05) for societal drought risk depending on respondents' place of employment, based on pairwise Wilcoxon Rank sum test, with corrections for multiple testing, using the Benjamini-Hochberg method for p-value adjustment.**

| <i>Governance vulnerability factor</i>              | <i>Sectors</i> |           | <i>p-value</i> | <i>subcategory</i> |
|-----------------------------------------------------|----------------|-----------|----------------|--------------------|
| <i>Water transfer and drought policies</i>          | Research       | Authority | 0,04467        | Policies           |
| <i>Financial capacity of the government*</i>        | Company        | Authority | 0,038918       | Authority          |
| <i>Financial capacity of the government*</i>        | Research       | Authority | 0,038918       | Authority          |
| <i>Social/physical capacity within authorities*</i> | Company        | Authority | 0,004864       | Authority          |
| <i>Social/physical capacity within authorities*</i> | Research       | Authority | 0,026956       | Authority          |

## S2. List of questions and vulnerability factors included in the survey as well as their response options.

Questions are listed in bold text, and response options are listed in parentheses after each question.

The respondents were also given a short introduction to the concept of risk and vulnerability before answering the survey questions.

## Background information collected

**Q1. What is your language preference for answering the survey?** (*Swedish/English*)

**Q2. Where are you currently employed?** (*Academia/ Governmental authority or public sector/NGO/Private or state-owned enterprise/sector association/Research institute/Other*)

Follow-up question if answer to Q2 was “governmental authority or public sector”:

**Q2.1. What level of authority or part of public sector do you work in?**

(*Municipality/County administrative board/National level agency/Water district board/Other*)

**Q3. What sector do you primarily work with?** (*Agriculture/Forestry/Water resources/Water supply/Environment & ecosystem services/Energy production/Water intensive industry*)

**Q4. Which of the following areas do you primarily focus on in your work?** Different multiple-choice options were given depending on answer to Q3. The response options were:

- Agriculture: (*Crop production/Livestock breeding/Vegetables & fruit production/Other (free text)*)
- Forestry: (*Wood production/Forest conservation/Other (free text)*)
- Water supply: (*Drinking water production & distribution/ Other (free text)*)
- Water resources: (*Water resources management/ Other (free text)*)
- Environment & ecosystems: (*Terrestrial ecosystems/aquatic ecosystems/both*)
- Energy production: (*hydropower/nuclear power/thermal power/Other (free text)*)
- Water intensive industry: (*paper & pulp industry/metallurgical industry/chemical industry/Other (free text)*)

**Q5. How long have you worked in this field?** (*0-5 years/5-10 years/>10 years*)

**Q6. How do you judge your level of experience & knowledge concerning drought-related issues in this field?** (*0-no experience/1/2/3/4 – significant experience*)

**Q7. Gender** (*Female/Male/ Non-binary/I'd rather not disclose*)

**Q8. Geographical location** (*County*)

## Sectoral vulnerability factors

**Q9. What impact do the following factors have on the risk of negative drought impacts in your sector or field of expertise? Indicate their impact on a scale from 0 (no impact) to 4 (large impact)<sup>1</sup> depending on their impact on the risk of negative drought impacts in your sector or primary field of focus.**

### Factors included in this section:

*Existence of local knowledge about adaptive approaches for the sector regarding drought*

*Presence of adaptive measures regarding drought*

*Presence of financial support for small scale water projects*

*Presence of forest management practices that induce climate-adapted species transitions*

*Presence of scientists employed in sector*

*The distribution of hydropower plants*

*The age of hydropower plants*

*Availability of dynamic models for decision support regarding drought*

---

<sup>1</sup> The option “I don’t know” was also available

*Availability of dynamic vegetation models for decision support regarding drought*  
*Availability of local resolution risk modelling regarding drought*  
*Availability of drought insurance*  
*In-house ability to apply and receive tender amounts and financial support*  
*Sectoral actor's level of available assets*  
*Sectoral actor's level of solvency (ability to pay off one's debts)*  
*The financial dependency on sector as only source of income for actors*  
*Appropriate size of water allocation in water permits to sustain irrigation during droughts*  
*Presence of effective irrigation systems*  
*Presence of irrigation*  
*The amount of water available for irrigation during drought*  
*The possibility to expand irrigation practices*  
*Having growth limiting conditions*  
*Level of land and soil degradation*  
*The elevation*  
*The geographical characteristics of the area*  
*The level of fertilizer use*  
*The level of productivity of land*  
*The proportion of fertile soils*  
*The soil water holding capacity*  
*Presence of drought resilient seedlings during planting*  
*Presence of drought resilient stand mixtures*  
*Presence of fragmented forests or forests of small size*  
*Presence of monocultures*  
*Presence of shallow rooted crops/species*  
*Presence of species outside its natural range*  
*Presence of species outside its xeric distribution limit*  
*Presence of species/stock suitable for future drought projections*  
*The drought tolerance of cultivated/existing species*  
*Presence of deteriorating ecosystems*  
*Presence of land area covered by forest & forest vegetation*  
*Presence of land area covered by wetlands, lakes and ponds*  
*Presence of water dependent ecosystems*  
*Presence of water quality deterioration*  
*Access to public drinking water service*  
*Level of groundwater exploitation*  
*Possibilities for development of water storage*  
*Presence of alternative water source & water supply*  
*Presence of competing water interests*  
*Presence of permanent water restrictions*

*Presence of regional water distribution networks*

*Presence of reliable water resource for water supply*

*Presence of water stress*

*Availability of decision support systems regarding drought*

*Availability of results from a drought risk assessment*

*Availability of drought early warning systems*

*Availability of relevant data regarding drought*

*Availability to long-term supply and demand assessments*

*Availability to real time drought risk assessment and management tools*

*Presence of drought monitoring schemes*

*Presence of groundwater monitoring*

*The financial capacity of the government to offer drought related support*

*The level of competence within authorities to offer drought related support*

*The level of coordination & cooperation among authorities to offer drought related support*

*The level of drought awareness within authorities*

*The social/physical capacity within authorities to offer drought related support*

*Presence of an authority level drought management plan*

*Presence of building standards relating to water efficiency*

*Presence of collaborative decision making & development at authority level, through inclusion of local knowledge and use of public participation*

*Presence of coordinated Water Strategy at authority level*

*Presence of authority level drought plan that includes drought awareness-raising measures*

*Presence of local water management plan*

*Presence of planned drought prevention measures on authority level*

*Presence of water transfer and drought policies*

*Existence of defined water use rights*

*Existence of water use priority classes in authority level drought management plan*

**Q10.** How confident are you with your rankings for this section? (0- highly unsure/1/2/3/4- highly confident)

**Q11.** Are you missing any factor(s) that you think has/have a large impact on the risk of experiencing negative effects from droughts in your sector? Please add them, as you add factors, please indicate their impact (0-4) and your confidence.

## Societal vulnerability factors

**Q12.** What impact do the following factors have on the risk of negative drought impacts in Swedish society? Indicate their impact on a scale from 0 (no impact) to 4 (large impact)<sup>2</sup> depending on their impact on the risk of negative drought impacts in Swedish society.

**Factors included in this section:**

---

<sup>2</sup> The option "I don't know" was also available



*Area having an aging population*

*Level of social integration*

*The level of drought awareness among water users*

*The level of socio-economic drought susceptibility of population*

*The presence of population decline*

*The size of town*

*The size of population*

*Access to public drinking water service*

*The financial dependency of society on water dependent industries*

*Availability of decision support systems regarding drought*

*Availability of results from a drought risk assessment*

*Availability of drought early warning systems*

*Availability of relevant data regarding drought*

*Availability to long-term supply and demand assessments*

*Availability to real time drought risk assessment and management tools*

*Presence of drought monitoring schemes*

*Presence of groundwater monitoring*

*The financial capacity of the government to offer drought related support*

*The level of competence within authorities to offer drought related support*

*The level of coordination & cooperation among authorities to offer drought related support*

*The level of drought awareness within authorities*

*The social/physical capacity within authorities to offer drought related support*

*Presence of an authority level drought management plan*

*Presence of building standards relating to water efficiency*

*Presence of collaborative decision making & development at authority level, through inclusion of local knowledge and use of public participation*

*Presence of coordinated Water Strategy at authority level*

*Presence of authority level drought plan that includes drought awareness-raising measures*

*Presence of local water management plan*

*Presence of planned drought prevention measures on authority level*

*Presence of water transfer and drought policies*

*Existence of defined water use rights*

*Existence of water use priority classes in authority level drought management plan*

**Q13. How confident are you with your rankings for this section? (0- highly unsure/1/2/3/4- highly confident)**

**Q14. Are you missing any factor(s) that you think has/have a large impact on the risk of experiencing negative effects from droughts in your sector? Please add them, as you add factors, please indicate their impact (0-4) and your confidence.**
